# Supplementary material for: TMEM135 links peroxisomes to the regulation of brown fat mitochondrial fission and energy homeostasis
Source: PubMed Central journal article supplement (PMC10541902; doi:10.1038/s41467-023-41849-8), 2023-09-29
Supplement: 41467_2023_41849_MOESM1_ESM.pdf [file 41467_2023_41849_MOESM1_ESM.pdf]

## Supplementary Information

### TMEM135 Links Peroxisomes to the Regulation of Brown Fat Mitochondrial Fission and Energy Homeostasis

Donghua Hu, Min Tan<sup>1</sup>, Dongliang Lu, Brian Kleiboeker, Xuejing Liu, Hongsuk Park, Alexxai V. Kravitz, Kooresh I. Shoghi, Yu-Hua Tseng, Babak Razani, Akihiro Ikeda, and Irfan J. Lodhi

**Supplementary information includes seven Supplementary Figures and one Supplementary Table.**

**Supplementary Fig. 1.** Effect of Pex16 deficiency on mitochondrial respiration and mitophagy in mouse brown adipocytes.

**Supplementary Fig. 2.** TMEM135 is present in peroxisomes and mitochondria.

**Supplementary Fig. 3.** TMEM135 gene expression increases during BAT SVF cell differentiation and after NE treatment.

**Supplementary Fig. 4.** Metabolic phenotyping of *Tmem135*-AKO mice.

**Supplementary Fig. 5.** Metabolic phenotyping of *Tmem135*<sup>TG</sup> mice.

**Supplementary Fig. 6.** Overexpression of TMEM135 in *Pex16*-AKO mice rescues cold tolerance and mtDNA copy number.

**Supplementary Fig. 7.** Gene expression analysis and effect of TMEM135 KD on mitochondrial morphology in different cell types.

**Supplementary Table 1.** Oligonucleotide sequences

**a**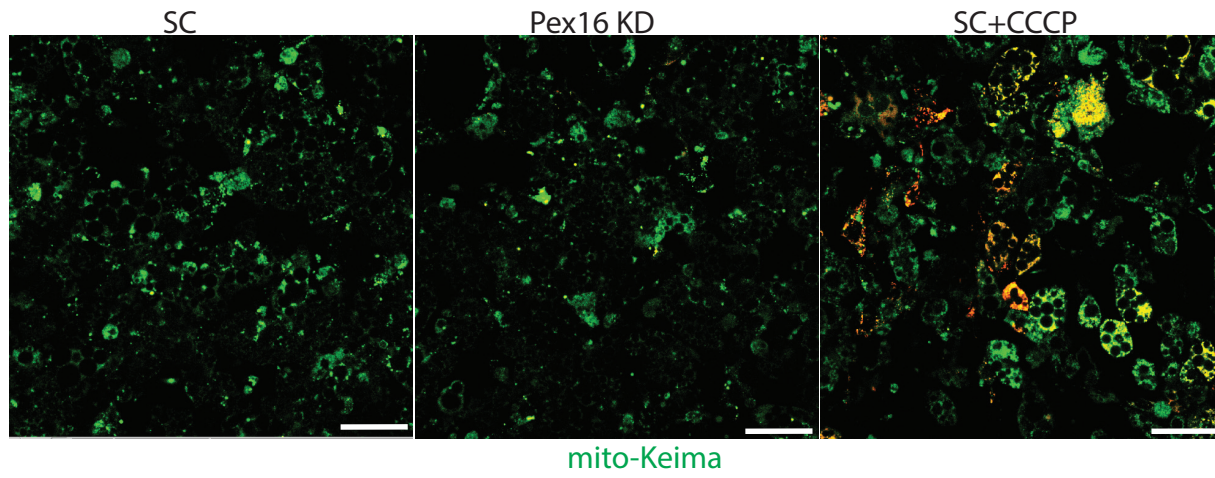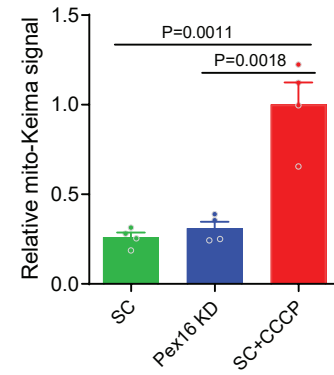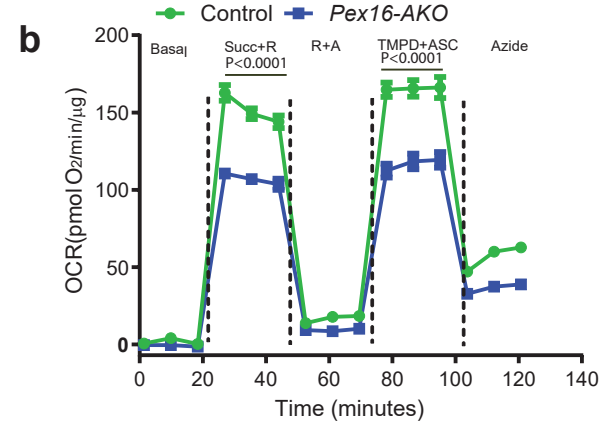

**Supplementary Fig. 1. Effect of Pex16 deficiency on mitochondrial respiration and mitophagy in mouse brown adipocytes.**

(a) Confocal imaging of mitophagy using mito-Keima in brown adipocytes treated with scrambled (SC) (n=4) or Pex16 shRNA (n=4). Carbonyl cyanide m-chlorophenylhydrazine (CCCP) was used as a positive control (n=4) to induce mitophagy. Plot shows quantification of mito-Keima signal. Scale bar: 50  $\mu$ m. (b) OCR measured using a Seahorse XF24 Extracellular Flux Analyzer in frozen BAT isolated from control (n=5) and Pex16-AKO (n=5) mice subjected to 3 day cold exposure. Succ+R, Succinate + Rotenone; R+A, Rotenone + antimycin A; TMPD+ASC, N,N,N',N'-tetramethyl-p-phenylenediamine + Ascorbic acid. Data are presented as mean  $\pm$  SEM; statistical significance was determined by Student's t test (a) or 2-way ANOVA with Bonferroni's post hoc test (b).

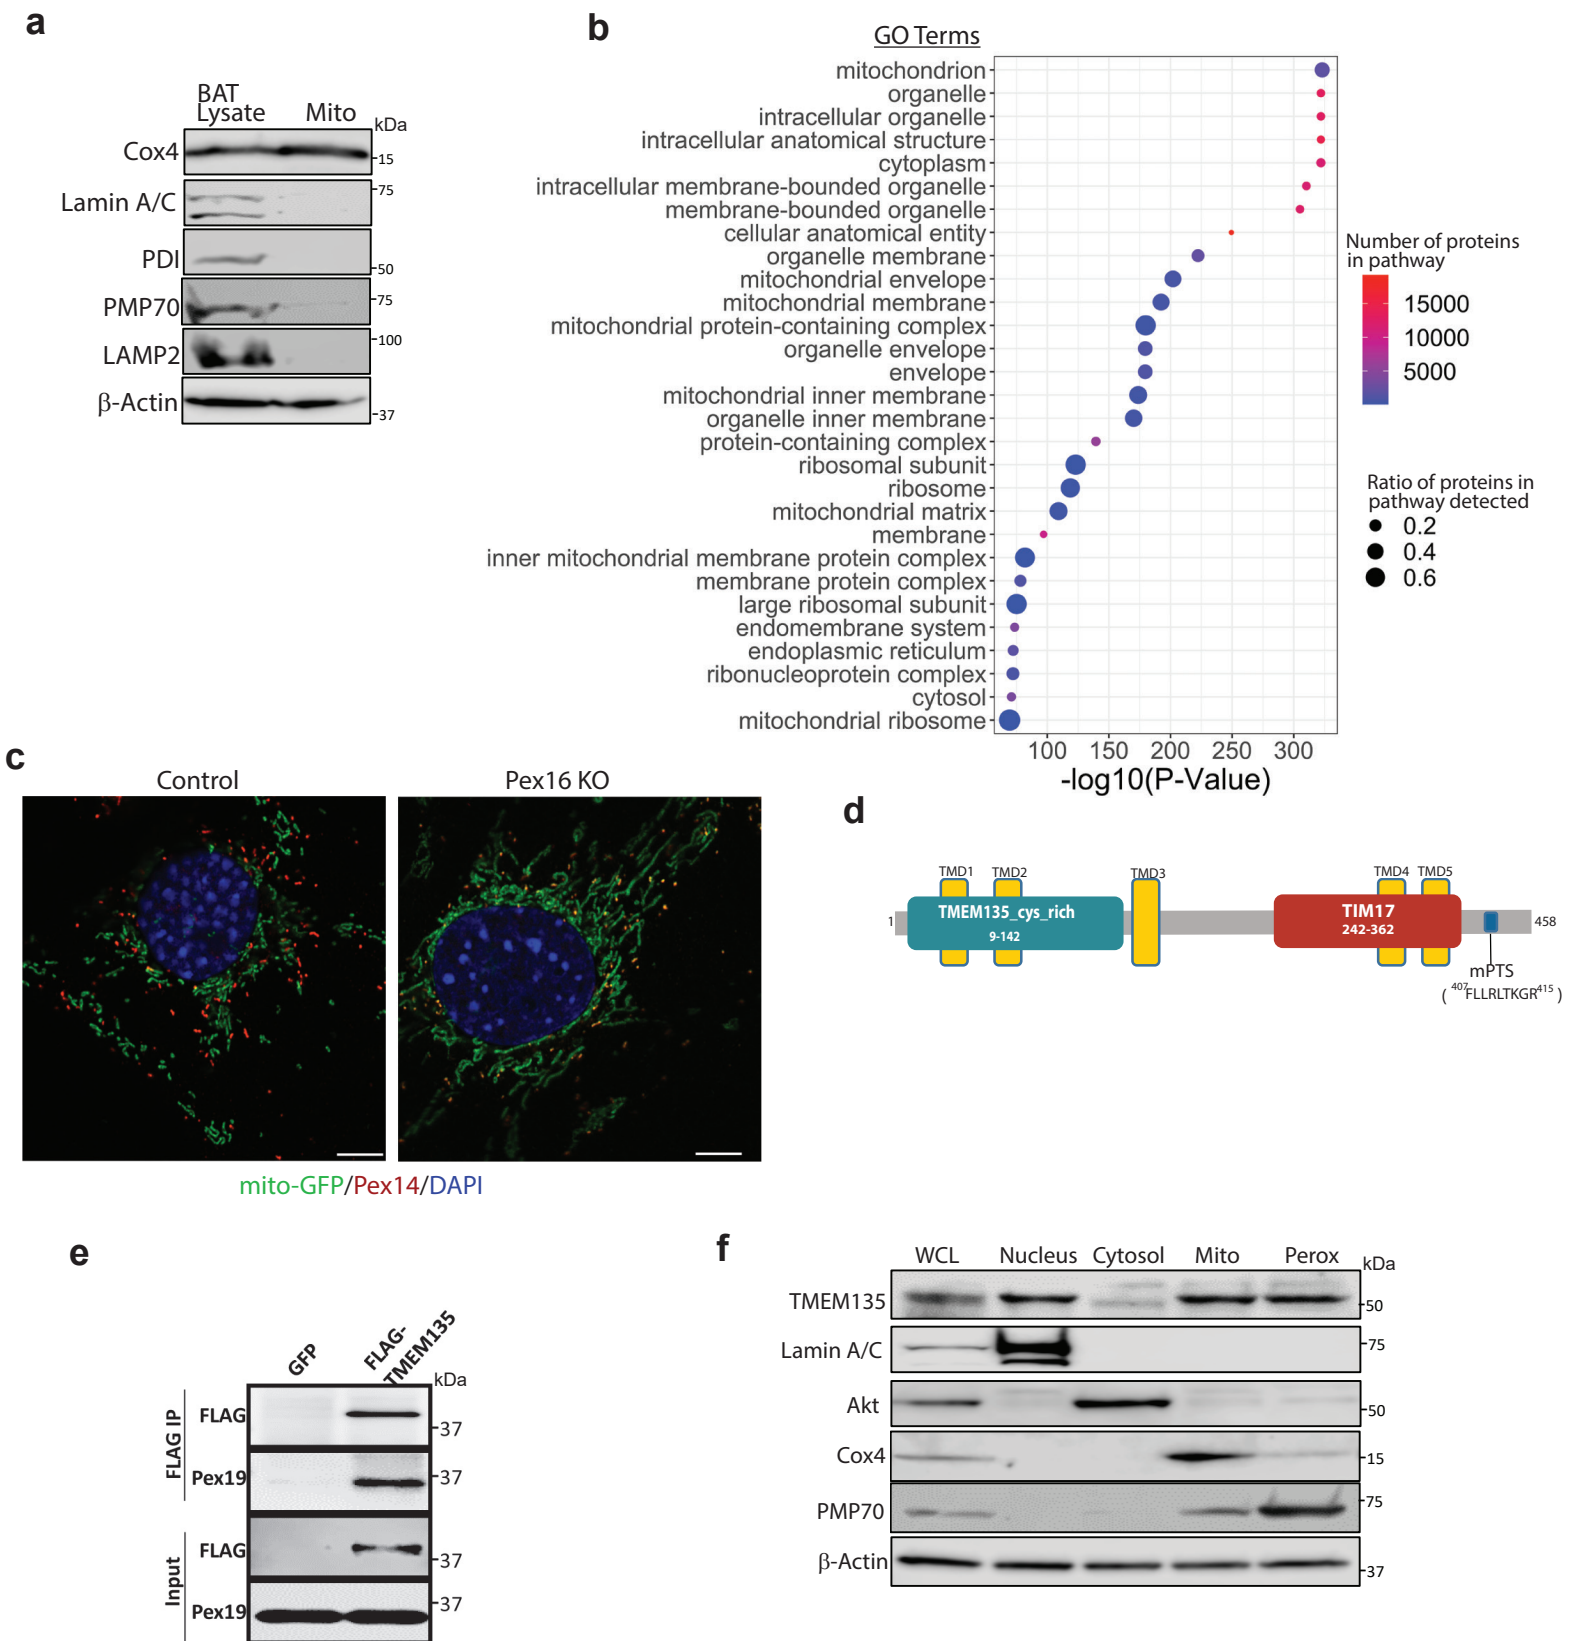

**Supplementary Fig. 2. TMEM135 is present in peroxisomes and mitochondria.**

(a) Western blot analysis of whole BAT lysate and mitochondrial fraction from brown adipose of wild-type C57BL/6J mice. (b) Gene Ontology (GO) terms (cellular component ontology) for unchanged proteins identified by mass spectrometry-based proteomics in mitochondria isolated from BAT of control and Pex16-AKO mice. (c) Immunofluorescence analysis in control and Pex16-AKO brown adipocytes expressing mito-GFP stained with an antibody against Pex14. Scale bar: 5  $\mu$ m. (d) A model of TMEM135 domain architecture showing that the protein contains an N-terminal TMEM135\_Cys\_rich domain and a C-terminal TIM17 domain. (e) Co-immunoprecipitation of endogenous Pex19 with FLAG-TMEM135 in HEK293 cells. (f) Western blot analysis of TMEM135 and organelle markers in whole cell lysates (WCL) and various subcellular fractions of differentiated brown pre-adipocytes from the wild-type C57BL/6J mice.

**a**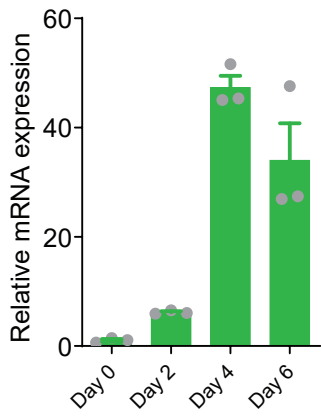**b**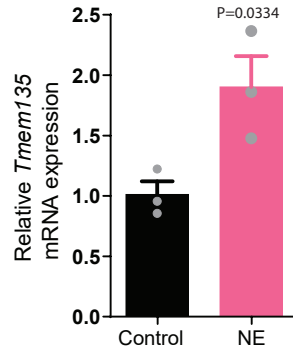

**Supplementary Fig. 3. TMEM135 gene expression increases during BAT SVF cell differentiation and after NE treatment.**

(a) qPCR analysis of *Tmem135* expression during adipogenesis in mouse BAT SVF cells; n=3. (b) qPCR analysis of *Tmem135* expression in brown adipocytes treated with NE (1  $\mu$ M) for 2 hours; n=3. Data are presented as mean  $\pm$  SEM; statistical significance was determined by two-tailed unpaired Student's t test (b).

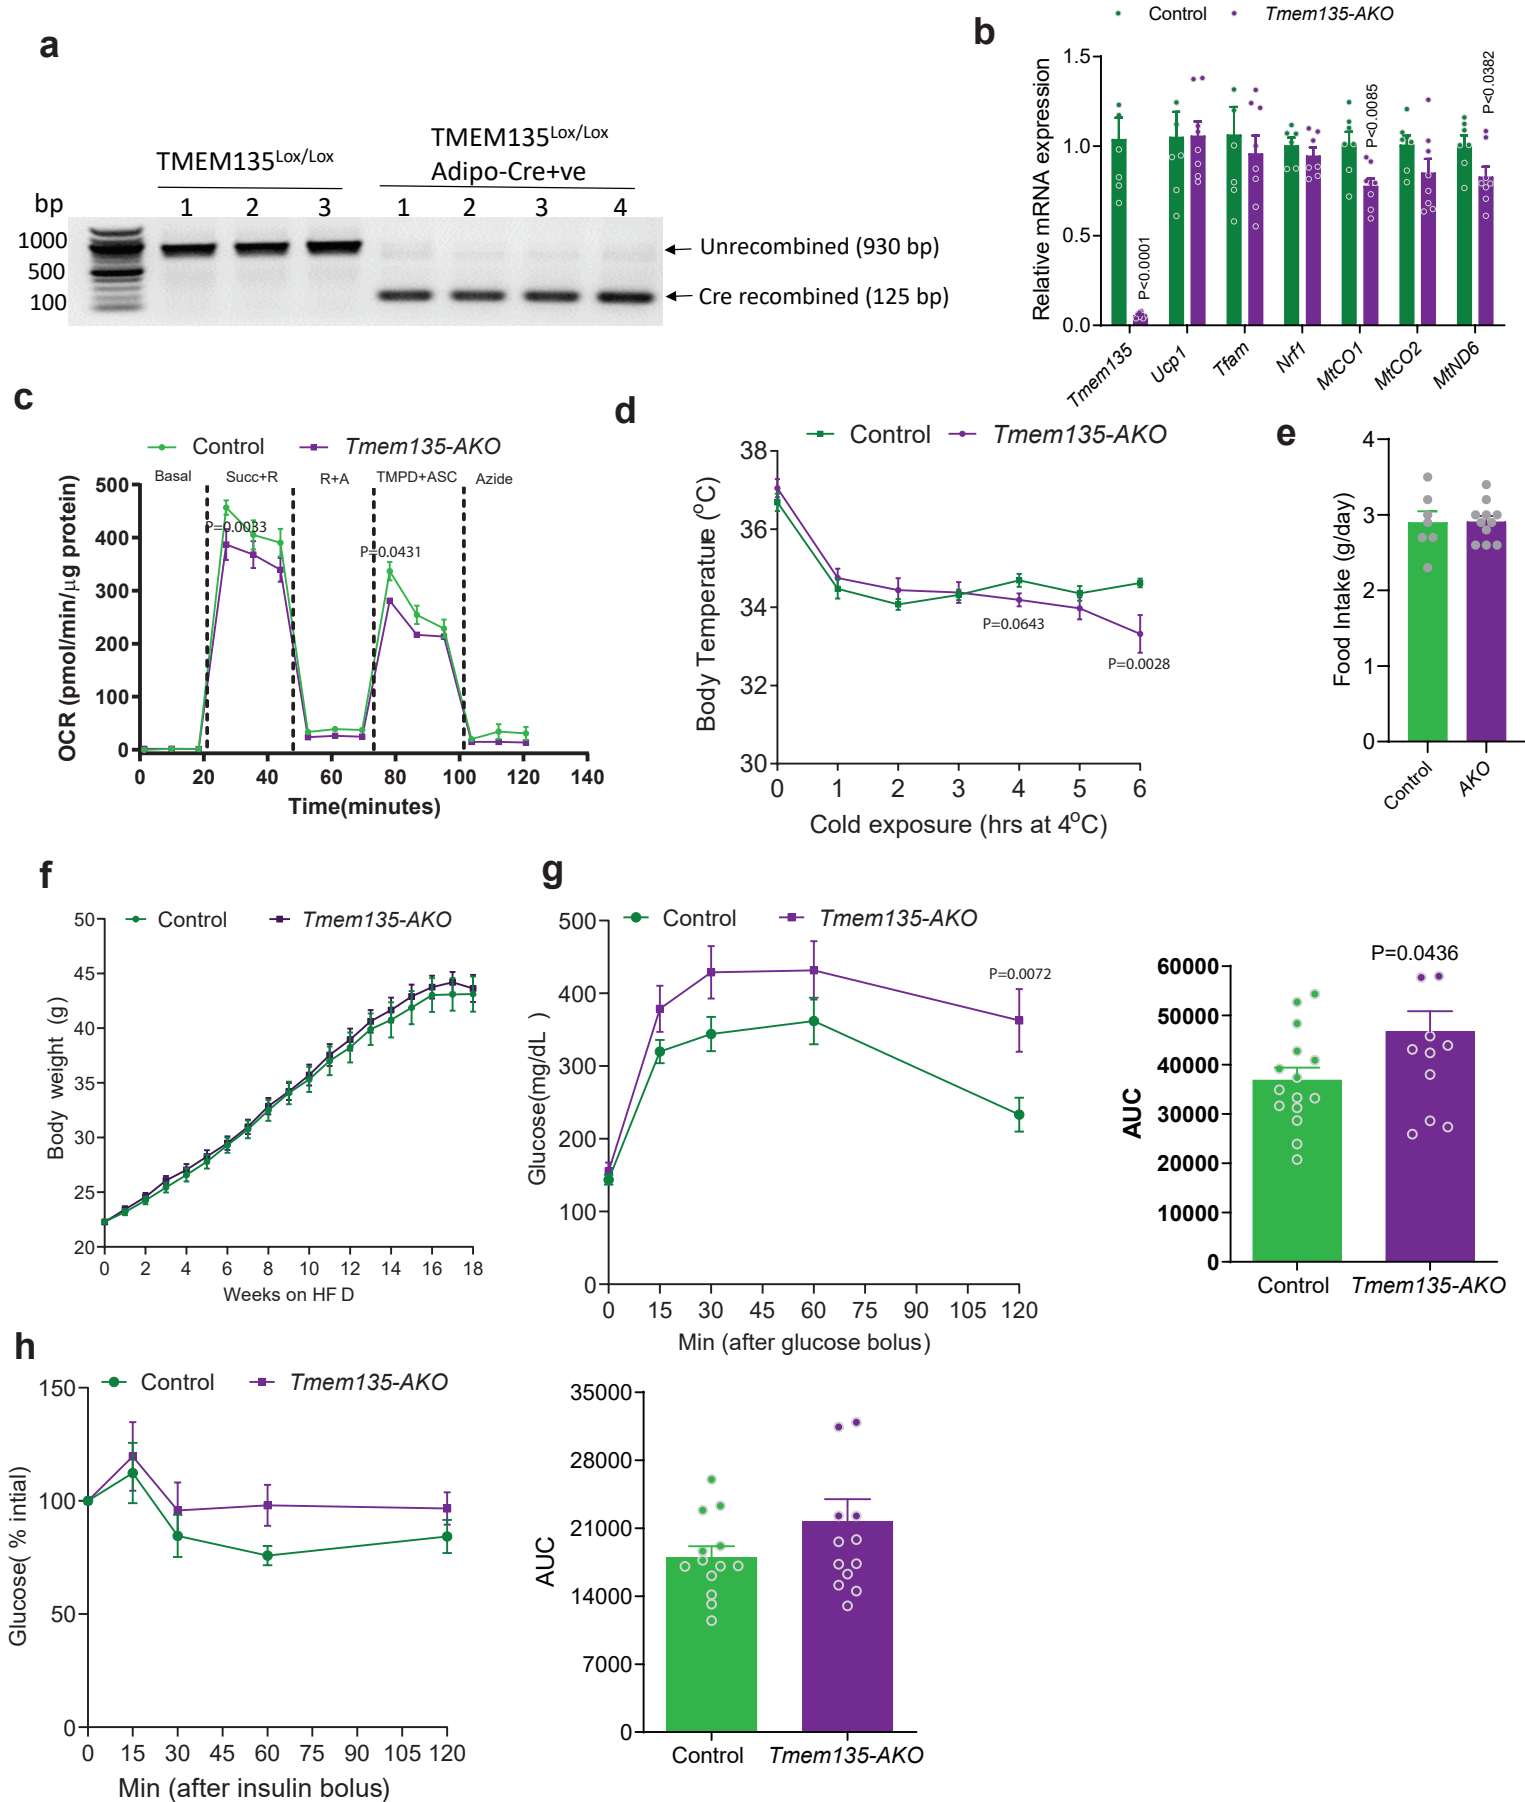

**Supplementary Fig.4. Metabolic phenotyping of *Tmem135-AKO* mice.**

(a) Confirmation of Cre-mediated recombination of the floxed alleles in *Tmem135-AKO* mice. (b) qPCR analysis of mitochondria-encoded genes in control (n=7) and *Tmem135-AKO* (n=8) mice. (c) OCR measured using a Seahorse XF24 Extracellular Flux Analyzer in frozen BAT isolated from control (n=5) and *Tmem135-AKO* (n=5) mice subjected to 7 day cold exposure; Succ+R, Succinate + Rotenone; R+A, Rotenone + antimycin A; TMPD+ASC, N,N,N',N'-tetramethyl-p-phenylenediamine + Ascorbic acid.

(**d**) Body temperature of male *Tmem135-AKO* (n=10) and control (n=17) mice subjected to a 6-hour cold challenge. (**e**) Food intake of female HFD-fed *Tmem135-AKO* (n=11) and control (n=7) mice. (**f**) Body weight of male HFD-fed *Tmem135-AKO* (n=15) and control (n=16) mice. (**g**) Glucose tolerance testing and AUC in male HFD-fed *Tmem135-AKO* (n=13) and control (n=15) mice. (**h**) Insulin tolerance testing and AUC in male HFD-fed *Tmem135-AKO* (n=13) and control (n=13) mice. Data are presented as mean  $\pm$  SEM; statistical significance was determined by two-tailed unpaired Student's t test (**b**, **d**, **e**, **f**, **g** and **h**) or 2-way ANOVA with Bonferroni's post hoc test (**c**, **g**, and **h**).

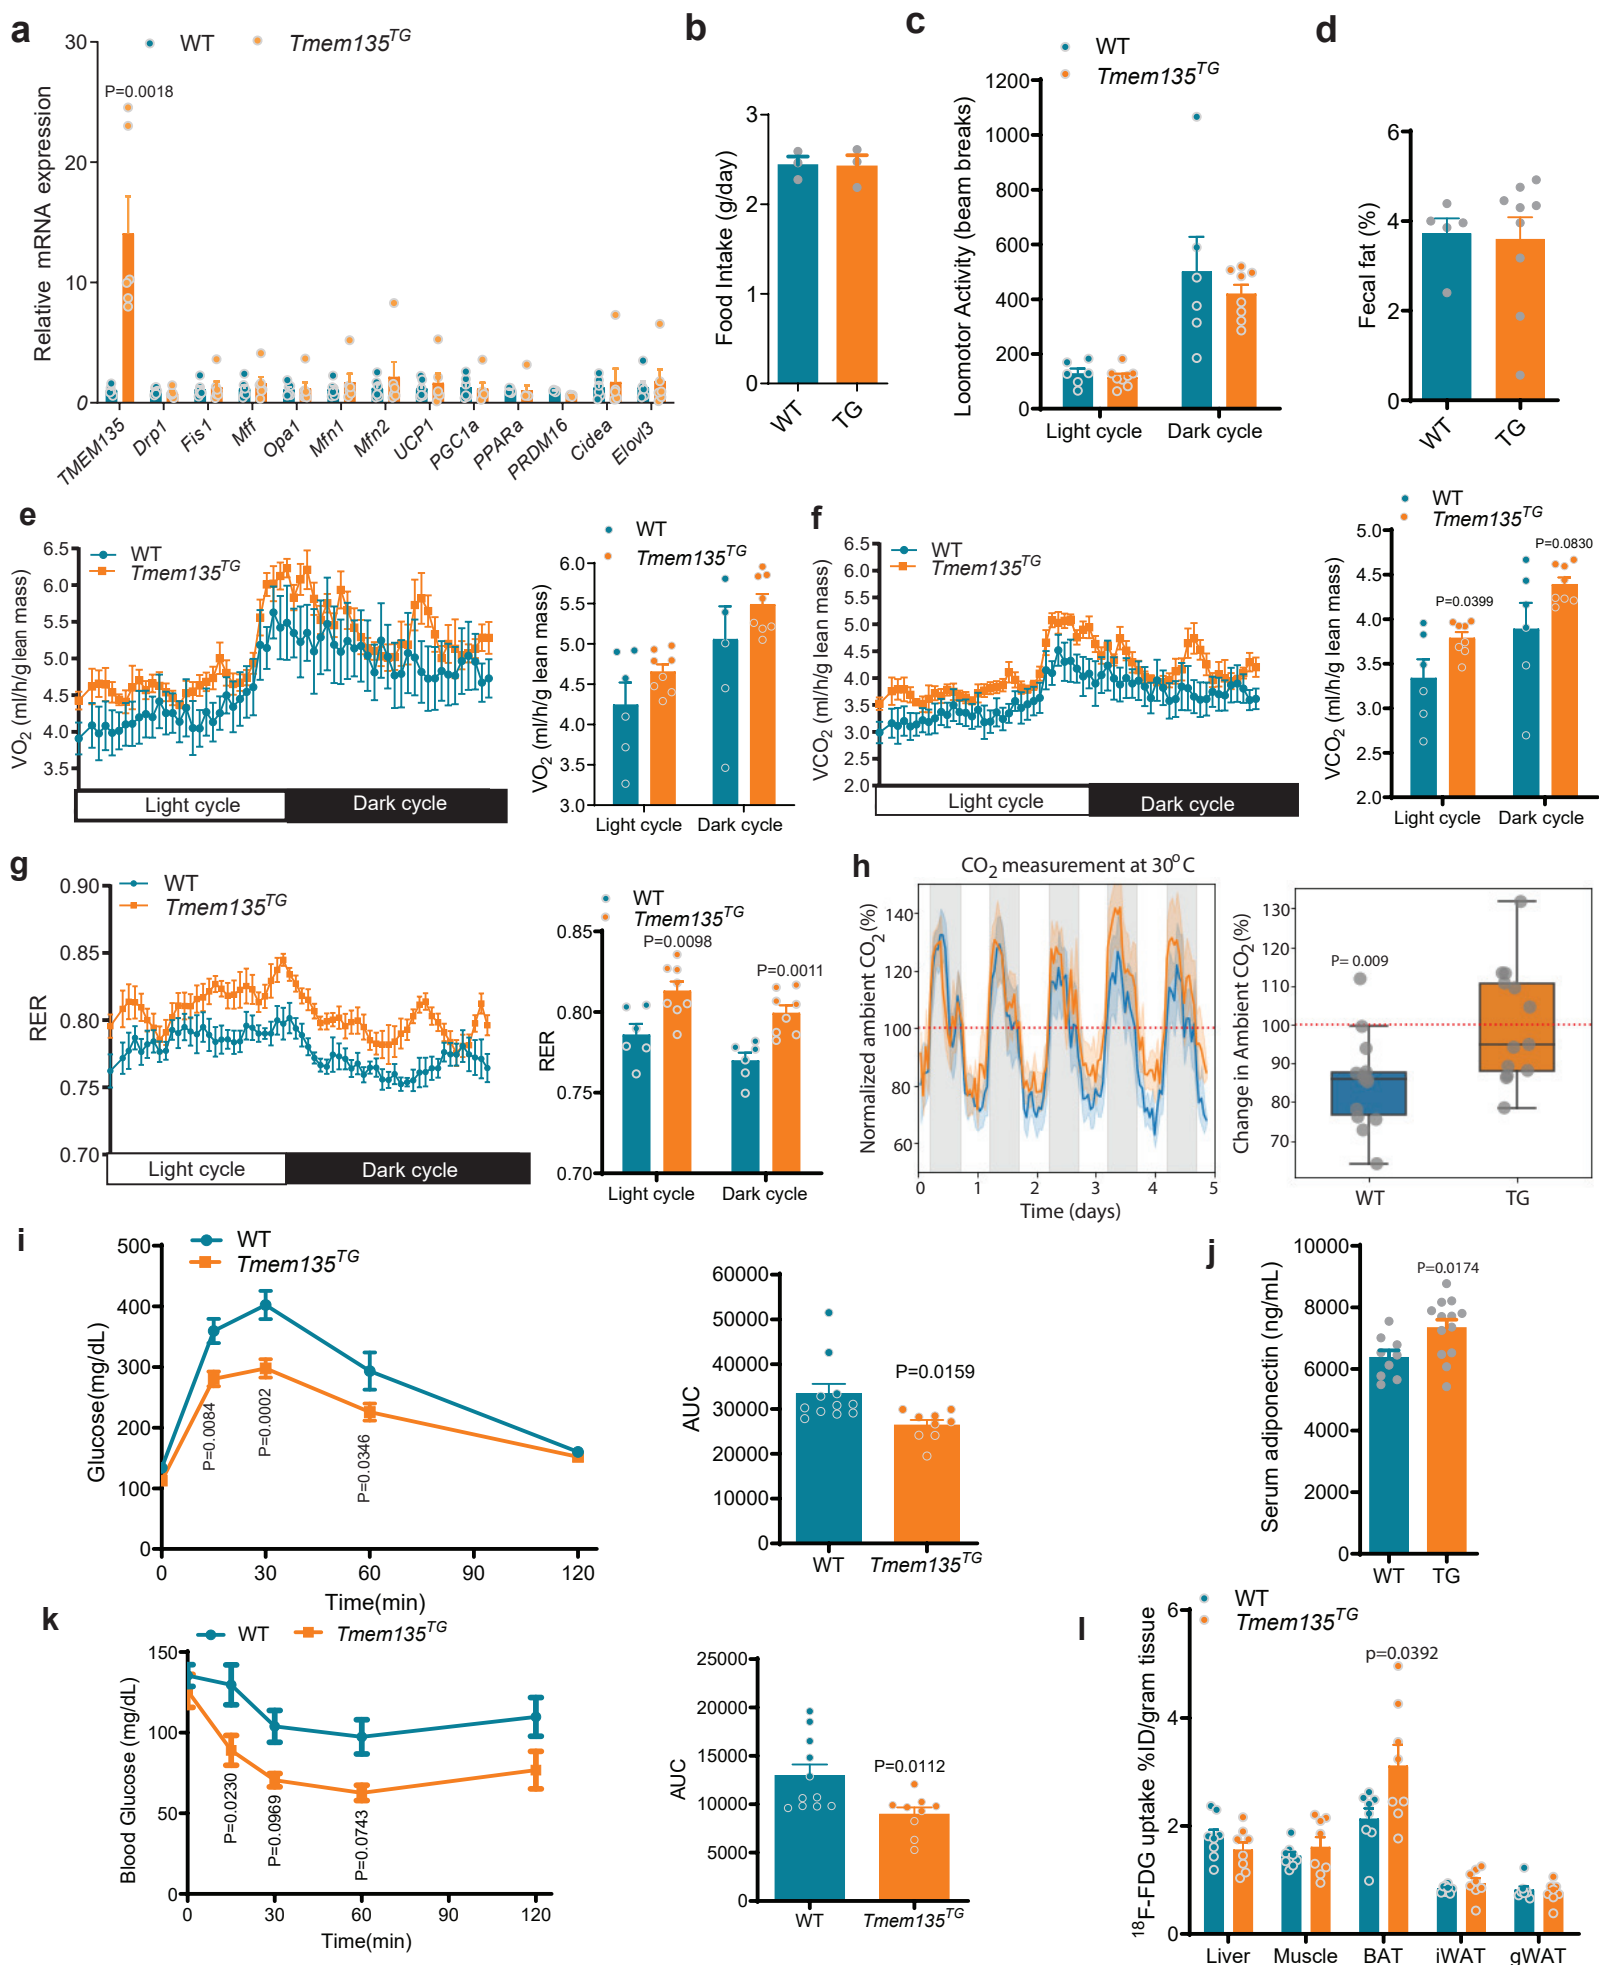

**Supplementary Fig. 5. Metabolic phenotyping of *Tmem135*<sup>TG</sup> mice.**

(a) qPCR analysis of mitochondrial dynamics and thermogenic genes in BAT of *Tmem135*<sup>TG</sup> (n=6) and WT (n=6) mice. (b) Food

intake of male *Tmem135<sup>TG</sup>* (n=3) and WT (n=3) mice fed a high fat diet. **(c)** Locomotor activity in male HFD-fed *Tmem135<sup>TG</sup>* (n=8) and WT (n=6) mice. **(d)** Fecal fat of male HFD-fed *Tmem135<sup>TG</sup>* mice fed a high fat diet. These mice were placed in metabolic cages for 48 hours with 12-hour light/dark cycles; WT n=5; *Tmem135<sup>TG</sup>* n=9. **(e)-(g)**  $VO_2$ ,  $VCO_2$ , and respiratory exchange ratio (RER) of *Tmem135<sup>TG</sup>* (n=8) and WT (n=6) mice fed a HFD for 4 weeks, prior to significant difference in body weight. **(h)** Change of carbon dioxide generation using an in-cage  $CO_2$  monitor in *Tmem135<sup>TG</sup>* (n=14) and WT (n=13) mice maintained at thermoneutrality. **(i)** Glucose tolerance testing and AUC of female HFD-fed *Tmem135<sup>TG</sup>* (n=9) and WT (n=11) mice. **(j)** Fasting serum adiponectin of male HFD-fed *Tmem135<sup>TG</sup>* (n=13) and WT (n=9) mice. **(k)** Insulin tolerance testing and AUC of female HFD-fed *Tmem135<sup>TG</sup>* (n=9) and WT (n=11) mice. **(l)** Quantification of  $^{18}F$ -FDG uptake in indicated tissues from male *Tmem135<sup>TG</sup>* (n=8) and WT (n=8) mice fed with a high fat diet for 14 weeks. Data are presented as mean  $\pm$  SEM; statistical significance was determined by two-tailed unpaired Student's t test (**a-d**, **h**, **l**, **j**, **k** and **l**) or 2-way ANOVA with Tukey's honest significant difference post hoc test (**e-g**) or Bonferroni's post hoc test (**i** and **k**).



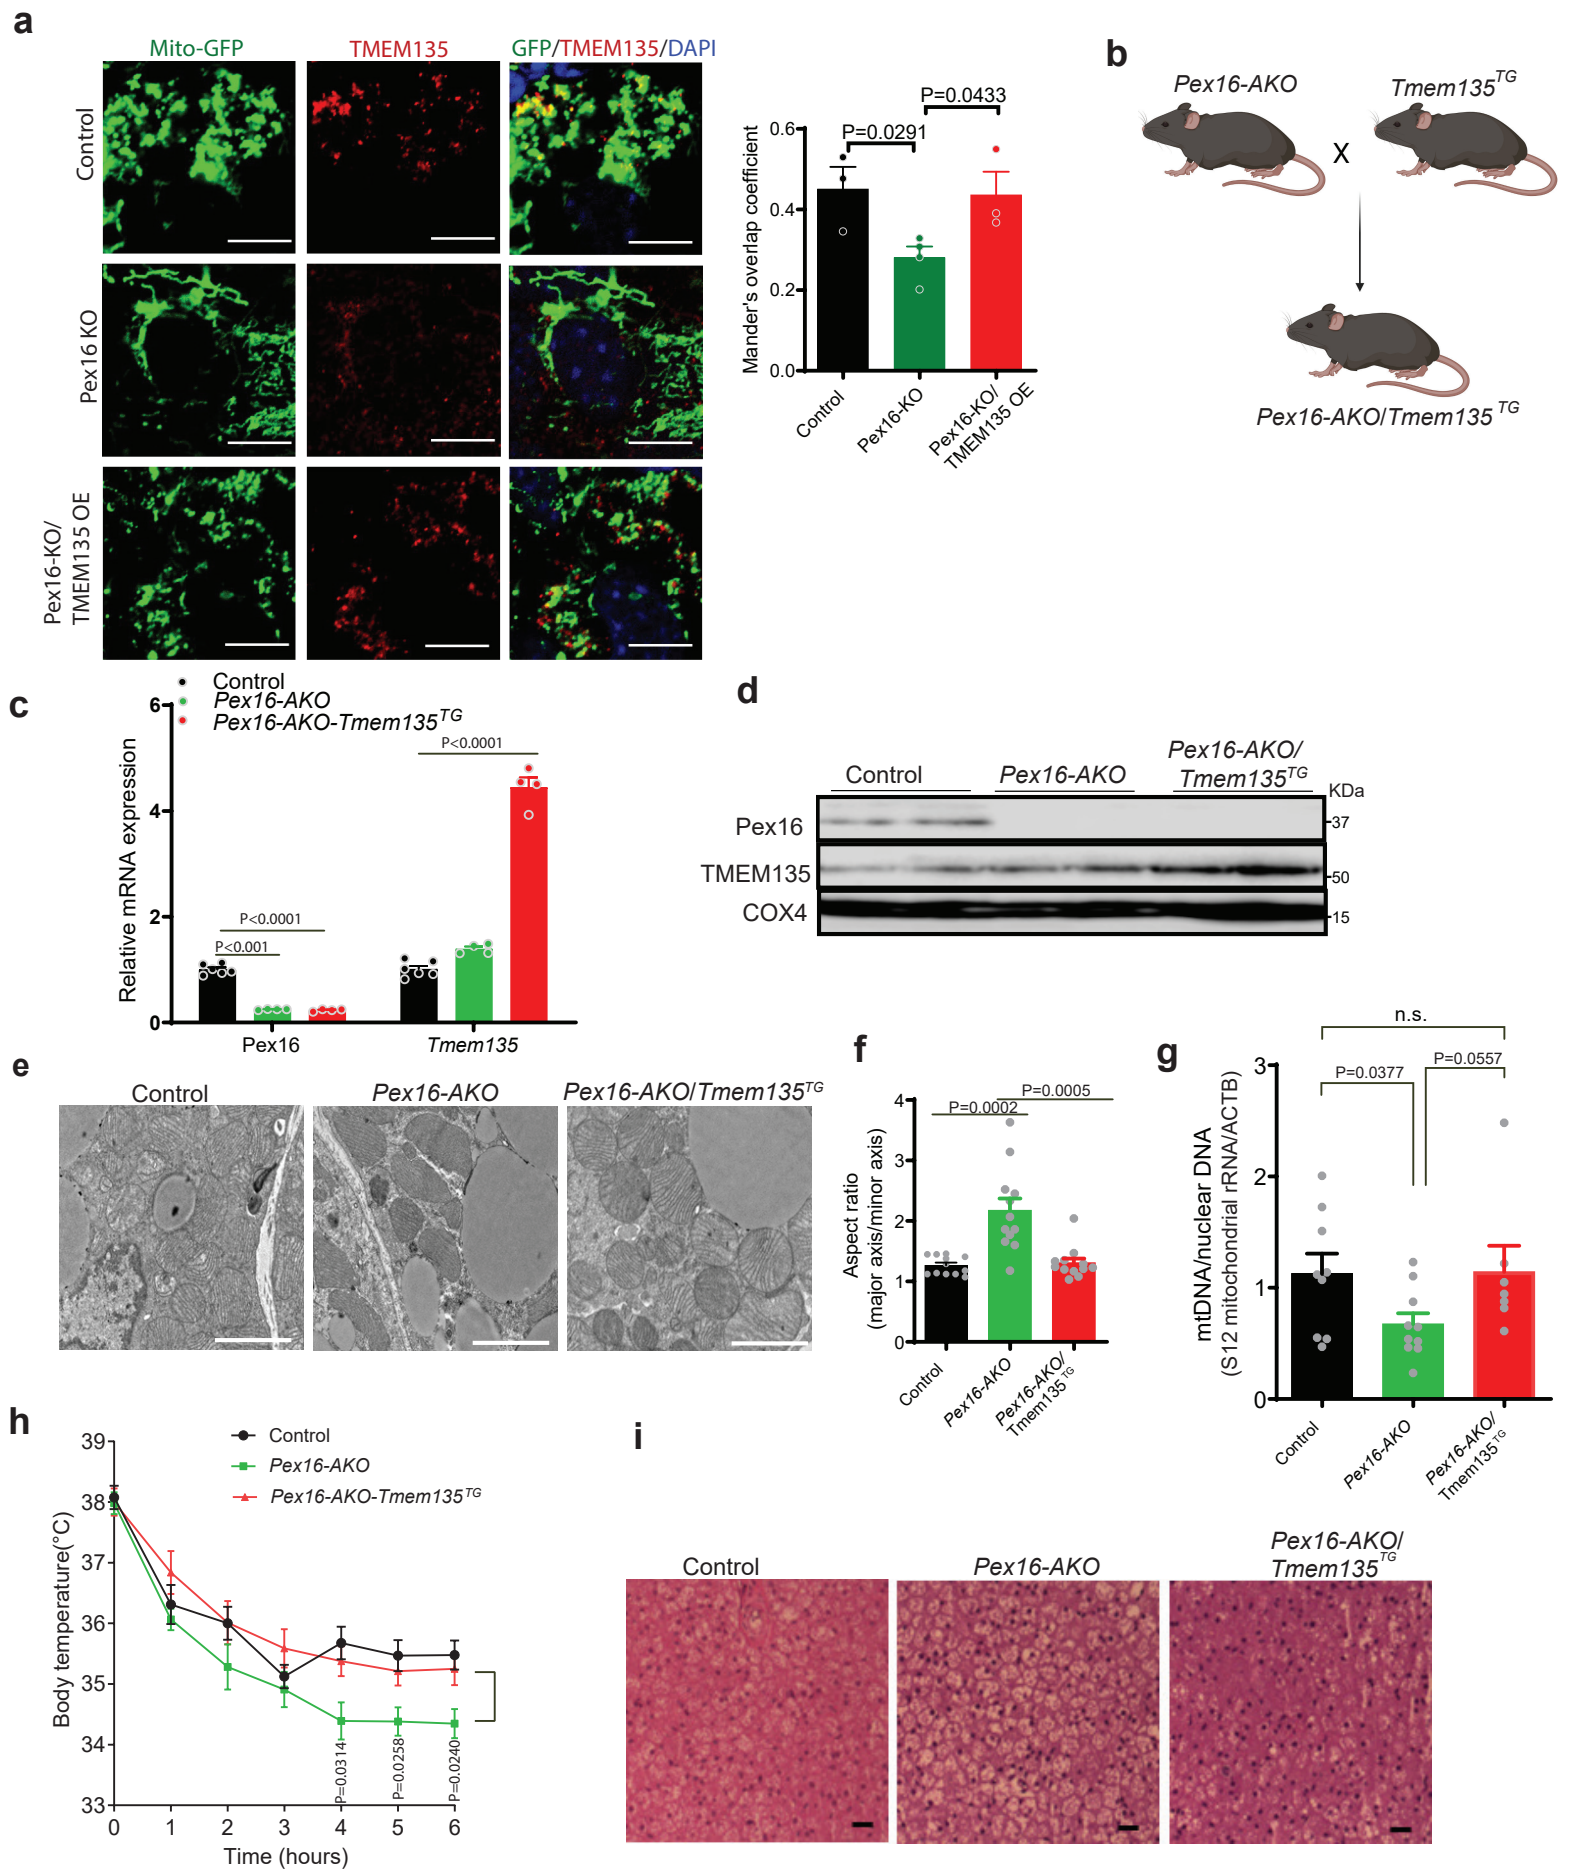

**Supplementary Fig. 6. Overexpression of TMEM135 in *Pex16-AKO* mice rescues cold tolerance and mtDNA copy number.** (a) Immunofluorescence analysis in control (*Pex16<sup>lox/lox</sup>*), *Pex16* KO (*Pex16<sup>lox/lox</sup>; adipo-Cre* positive) and *Tmem135* overexpressing *Pex16* KO (*Pex16* KO/TMEM135 OE) brown adipocytes stably expressing mito-GFP. Quantification of the colocalization using ImageJ. Scale bar: 10  $\mu$ m. The images are representative of three independent experiments and the quantification is based on a

total of 27 control, 50 Pex16-KO cells, and 26 Pex16 KO-Tmem135 OE cells. **(b)** Simplified breeding scheme of *Pex16-AKO/Tmem135<sup>TG</sup>* double mutant mice. Created with BioRender.com. **(c)** and **(d)** qPCR (control n=6; *Pex16-AKO* n=4; *Pex16-AKO/Tmem135<sup>TG</sup>* n= 4) and Western blot (n=2 for each group) analysis of Pex16 and TMEM135 in *Pex16-AKO/Tmem135<sup>TG</sup>* double mutant mice. **(e)** TEM analysis of BAT from control, *Pex16-AKO* and *Pex16-AKO/Tmem135<sup>TG</sup>* double mutant mice subjected to 3 day cold exposure. Scale bar: 1  $\mu\text{m}$ . **(f)** Aspect ratio (ratio of major axis length to minor axis length) measured in BAT mitochondria. Data are based on 12 mitochondria per condition. **(g)** mtDNA copy number normalized to nuclear DNA in control, *Pex16-AKO* and *Pex16-AKO/Tmem135<sup>TG</sup>* double mutant mice subjected to 3 day cold exposure; control n=9; *Pex16-AKO* n=10; *Pex16-AKO/Tmem135<sup>TG</sup>* n=7. **(h)** Body temperature of control, *Pex16-AKO* and *Pex16-AKO/Tmem135<sup>TG</sup>* double mutant mice subjected a 6-hour cold challenge; control n=9; *Pex16-AKO* n=11; *Pex16-AKO/Tmem135<sup>TG</sup>* n= 8. **(i)** H&E staining of control, *Pex16-AKO* and *Pex16-AKO/Tmem135<sup>TG</sup>* double mutant mice subjected to 3 days cold exposure. The images are representative of 3 mice per genotype. Scale bar: 50  $\mu\text{m}$ . Data are presented as mean  $\pm$  SEM; statistical significance was determined by two-tailed unpaired Student's t test (**a**, **c**, **f**, **g**, and **h**).

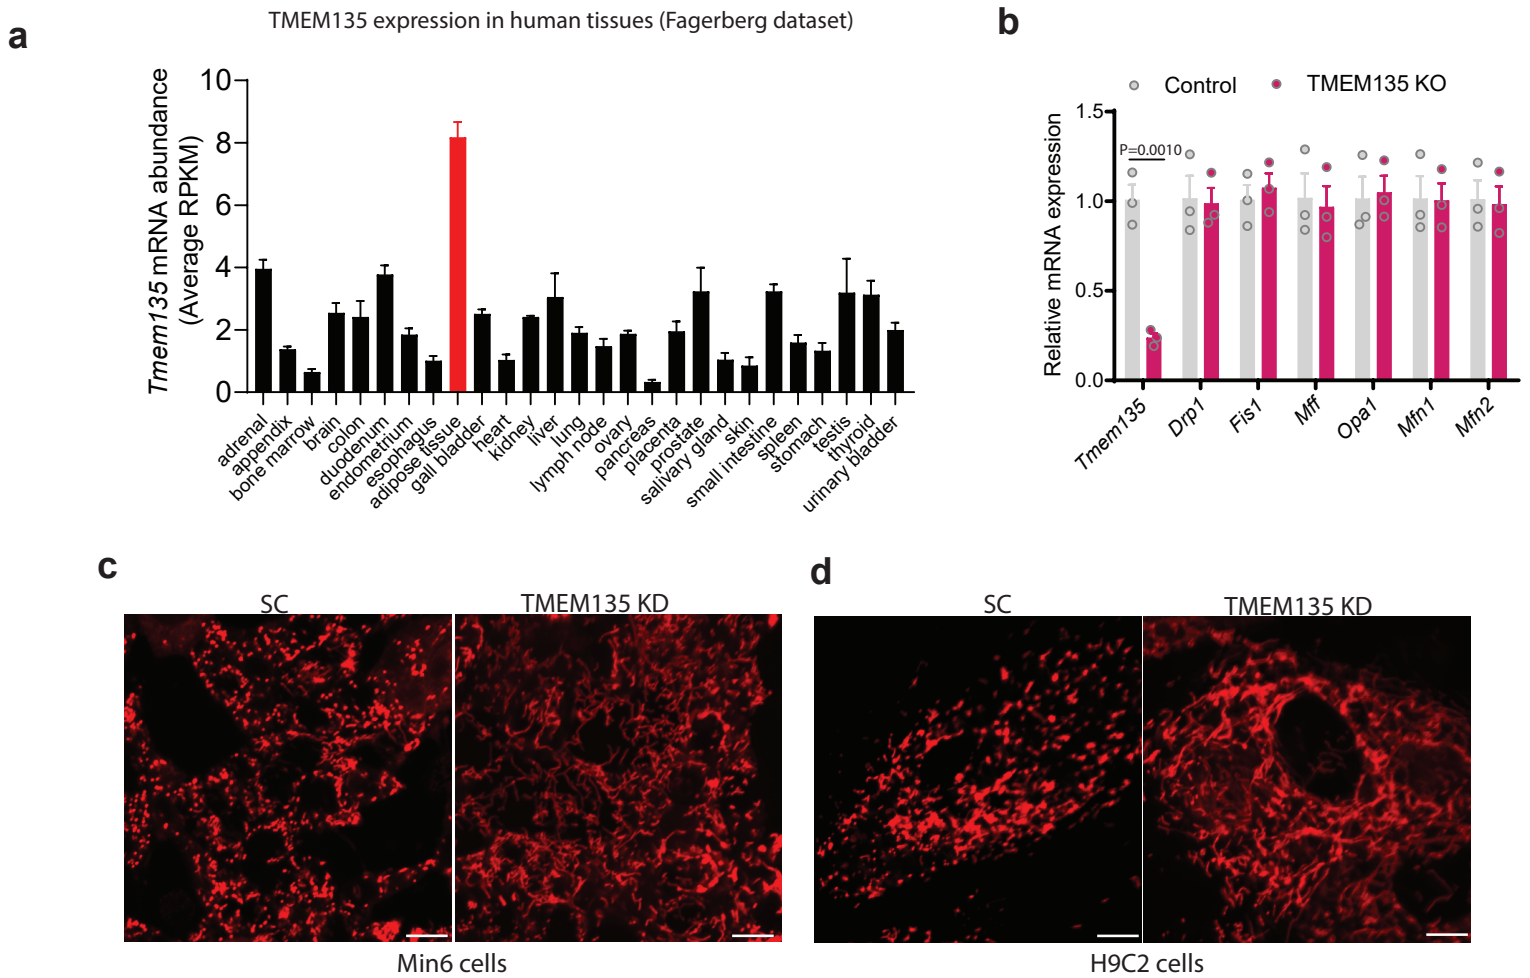

**Supplementary Fig. 7. Gene expression analysis and effect of TMEM135 KD on mitochondrial morphology in different cell types.**

(a) *Tmem135* gene expression in major human tissues, based on publicly available data (Fagerberg et al. [Ref 47]). (b) qPCR analysis of mitochondrial dynamics genes in control (n=3) and TMEM135 KO (n=3) human brown adipocytes. (c) Mitochondrial morphology of in Min6 mouse insulinoma cells treated with scrambled (SC) or TMEM135 shRNA and stained with TMRE for using confocal microscopy. Scale bar: 10  $\mu$ m. (d) Mitochondrial morphology of in H9C2 rat cardiomyocytes treated with scrambled (SC) or TMEM135 shRNA and stained with TMRE for using confocal microscopy. Scale bar: 10  $\mu$ m. Data are presented as mean  $\pm$  SEM; statistical significance was determined by two-tailed unpaired Student's t test (b).

Supplementary Table 1. Oligonucleotide sequences.

| Name          | Forwad(5'-3')                   | Reverse (5'-3')                 |
|---------------|---------------------------------|---------------------------------|
| L-32          | TTC CTG GTC CAC AAT GTC AA      | GGC TTT TCG GTT CTT AGA GGA     |
| TMEM135       | AGG CTG GAA AGG TTC CCT ATT     | CGC CAG TAC CAA ACA CAT CC      |
| Pex16         | CCG TTC TAT GAC CGC TTC TC      | GGA GGG CAA GTA GTC CAT GA      |
| PMP70         | TCT GCC TAC TCC ATA AGC GG      | CAC CAC AGC TCG CTC TTT CT      |
| Drp1          | AGA TCG TCG TAG TGG GAA CG      | AGA ATG AGA GGT CTC CGG GT      |
| Fis1          | ATT TGA ATA TGC CTG GTG CC      | CAT AGT CCC GCT GTT CCT CT      |
| Opa1          | TGG AAA ATG GTT CGA GAG TCA G   | CAT TCC GTC TCT AGG TTA AAG CG  |
| Mff           | GGA GTT CCA AAT GCC AGT GTG ATA | TGG ATA AGG TCA AGA TCT GCT GGT |
| Mfn1          | TGA ATA ACC GTT GGG ATG CT      | GCT TCC GAC GGA CTT ACA AC      |
| Mfn2          | GTC CTG GAC GTC AAA GGG TA      | ATT GAT CAC GGT GCT CTT CC      |
| UCP1          | TCA GCT GTT CAA AGC ACA CA      | GTA CCA AGC TGT GCG ATG TC      |
| PGC1 $\alpha$ | TGT AGC GAC CAA TCG GAA AT      | TGA GGA CCG CTA GCA AGT TT      |
| PRDM16        | CAG AGG TGT CAT CCC AGG AG      | ACG GAT GTA CTT GAG CCA GC      |
| PPAR $\alpha$ | AGT TCG GGA ACA AGA CGT TG      | CAG TGG GGA GAG AGG ACA GA      |
| Cidea         | CAGTGATTTAAGAGACGCGG            | TCTGCAATCCCATGAATGTC            |
| Elovl3        | CTT AAG GCC CTT TTT GGA GG      | CCG CGT TCT CAT GTA GGT CT      |
| GNPAT         | CATGGACGTTCTAGCTCCT             | CCCCTTTTTGAGGTCTTTTCG           |
| Tfam          | CCAAAAAGACCTCGTTCAGC            | GACAGATTTTTCCAAGCCTCA           |
| Nrf1          | TAGTCCTGTCTGGGGAAACC            | CTGGTACATGCTCACAGGGA            |
| MtCO1         | TCCTACCACCATCATTTCTCC           | CTGATGCTCCTGCATGGG              |
| MtCO2         | CATCAAACCGACCAGGGTT             | AATTATTGAAGCAGATCAGTTTTTCG      |
| MtND6         | CCAACATAACTCCAACATCATCA         | GTATTGGGGGTGATTATAGAGGTTT       |
| Mito-DNA      | TTA AGA CAC CTT GCC TAG CCA CAC | CGG TGG CTG GCA CGA AAT T       |
| Nucler-DNA    | ATG ACG ATA TCG CTG CGC TG      | TCA CTT ACC TGG TGC CTA GGG C   |
| huL-32        | AAG TTC CTG GTC CAC AAC GTC AA  | CAG CTC TTT CCA CGA CTT T       |
| huTMEM135     | CTC CTC TGT ACT TGA TTG CAG C   | TGA AGC GGA TTG TAG GAT CTC A   |
| hDrp1         | CTG CCT CAA ATC GTC GTA GTG     | GAG GTC TCC GGG TGA CAA TTC     |
| hFis1         | GTC CAA GAG CAC GCA GTT TG      | ATG CCT TTA CGG ATG TCA TCA TT  |
| hOpa1         | TGT GAG GTC TGC CAG TCT TTA     | TGT CCT TAA TTG GGG TCG TTG     |
| hMff          | ACTG AAG GCA TTA GTC AGC GA     | TCC TGC TAC AAC AAT CCT CTC C   |
| hMfn1         | TGG CTA AGA AGG CGA TTA CTG C   | TCT CCG AGA TAG CAC CTC ACC     |
| hMfn2         | CTC TCG ATG CAA CTC TAT CGT C   | TCC TGT ACG TGT CTT CAA GGA A   |
| huMito-DNA    | ACA CAG CAA GAC GAG AAG ACC CTA | TAC TGC TCG GAG GTT GGG TTC T   |

huNucler-DNA

AAG GGC GCT TTC TCT GCA CA

CAT AGG AAT CCT TCT GAC CCA TGC

---
