# Supplementary material for: TMEM135 links peroxisomes to the regulation of brown fat mitochondrial fission and energy homeostasis
Source: PubMed Central journal article supplement (PMC10541902; doi:10.1038/s41467-023-41849-8), 2023-09-29
Supplement: 41467_2023_41849_MOESM3_ESM.pdf [file 41467_2023_41849_MOESM3_ESM.pdf]

## **Description of Additional Supplementary Files**

File Name: Supplementary Data 1

Description: Peptides identified by mass spectrometry-based proteomics in mitochondria from Pex16 KO and WT mouse BAT.
