# Supplementary material for: TMEM135 links peroxisomes to the regulation of brown fat mitochondrial fission and energy homeostasis
Source: PubMed Central journal article supplement (PMC10541902; doi:10.1038/s41467-023-41849-8), 2023-09-29
Supplement: 41467_2023_41849_MOESM5_ESM.pdf [file 41467_2023_41849_MOESM5_ESM.pdf]

## Reporting Summary

Nature Portfolio wishes to improve the reproducibility of the work that we publish. This form provides structure for consistency and transparency in reporting. For further information on Nature Portfolio policies, see our [Editorial Policies](#) and the [Editorial Policy Checklist](#).

### Statistics

For all statistical analyses, confirm that the following items are present in the figure legend, table legend, main text, or Methods section.

n/a Confirmed

- The exact sample size ( $n$ ) for each experimental group/condition, given as a discrete number and unit of measurement
- A statement on whether measurements were taken from distinct samples or whether the same sample was measured repeatedly
- The statistical test(s) used AND whether they are one- or two-sided  
*Only common tests should be described solely by name; describe more complex techniques in the Methods section.*
- A description of all covariates tested
- A description of any assumptions or corrections, such as tests of normality and adjustment for multiple comparisons
- A full description of the statistical parameters including central tendency (e.g. means) or other basic estimates (e.g. regression coefficient) AND variation (e.g. standard deviation) or associated estimates of uncertainty (e.g. confidence intervals)
- For null hypothesis testing, the test statistic (e.g.  $F$ ,  $t$ ,  $r$ ) with confidence intervals, effect sizes, degrees of freedom and  $P$  value noted  
*Give  $P$  values as exact values whenever suitable.*
- For Bayesian analysis, information on the choice of priors and Markov chain Monte Carlo settings
- For hierarchical and complex designs, identification of the appropriate level for tests and full reporting of outcomes
- Estimates of effect sizes (e.g. Cohen's  $d$ , Pearson's  $r$ ), indicating how they were calculated

*Our web collection on [statistics for biologists](#) contains articles on many of the points above.*

### Software and code

Policy information about [availability of computer code](#)

Data collection PhenoMaster data were collected by PhenoMaster TSE Systems and Home-cage CO2 measurements data were collected by nondispersive infrared (NDIR) CO2 sensor.

Data analysis ImageJ (V1.53), GraphPad Prism (V9), R (V4.2.1) and Python (V3.11.0).

For manuscripts utilizing custom algorithms or software that are central to the research but not yet described in published literature, software must be made available to editors and reviewers. We strongly encourage code deposition in a community repository (e.g. GitHub). See the Nature Portfolio [guidelines for submitting code & software](#) for further information.

### Data

Policy information about [availability of data](#)

All manuscripts must include a [data availability statement](#). This statement should provide the following information, where applicable:

- Accession codes, unique identifiers, or web links for publicly available datasets
- A description of any restrictions on data availability
- For clinical datasets or third party data, please ensure that the statement adheres to our [policy](#)

The mass spectrometry proteomics data presented in Fig. 2 have been deposited in the Mass Spectrometry Interactive Virtual Environment (MassIVE) repository (<https://massive.ucsd.edu/ProteoSAFe/static/massive.jsp>) and are publicly available under accession code MSV000090693. All other data supporting this study are available within this Article and Supplemental Information. Source data are provided with this paper.

## Human research participants

Policy information about [studies involving human research participants and Sex and Gender in Research](#).

|                             |                                                                                         |
|-----------------------------|-----------------------------------------------------------------------------------------|
| Reporting on sex and gender | <input type="text" value="This research did not involve human research participants."/> |
| Population characteristics  | <input type="text" value="This research did not involve human research participants."/> |
| Recruitment                 | <input type="text" value="This research did not involve human research participants."/> |
| Ethics oversight            | <input type="text" value="This research did not involve human research participants."/> |

Note that full information on the approval of the study protocol must also be provided in the manuscript.

## Field-specific reporting

Please select the one below that is the best fit for your research. If you are not sure, read the appropriate sections before making your selection.

Life sciences       Behavioural & social sciences       Ecological, evolutionary & environmental sciences

For a reference copy of the document with all sections, see [nature.com/documents/nr-reporting-summary-flat.pdf](https://www.nature.com/documents/nr-reporting-summary-flat.pdf)

## Life sciences study design

All studies must disclose on these points even when the disclosure is negative.

|                 |                                                                                                                                                                                                                                  |
|-----------------|----------------------------------------------------------------------------------------------------------------------------------------------------------------------------------------------------------------------------------|
| Sample size     | <input type="text" value="Sample size was chosen to ensure an adequate statistical power. For in vitro study, at least three biological replicates were used. The number of animal are described in the manuscript."/>           |
| Data exclusions | <input type="text" value="No data exclusion."/>                                                                                                                                                                                  |
| Replication     | <input type="text" value="All figure data was obtained in at least 3 successful independent sets of experiments."/>                                                                                                              |
| Randomization   | <input type="text" value="For in vitro studies, conditions were randomized into control and experimental conditions as described in each assay. All animals in our experiments were randomly allocated into different groups."/> |
| Blinding        | <input type="text" value="In selected imaging experiments (where indicated in figure legends), quantification was performed with the investigator blinded to the identity of the samples."/>                                     |

## Reporting for specific materials, systems and methods

We require information from authors about some types of materials, experimental systems and methods used in many studies. Here, indicate whether each material, system or method listed is relevant to your study. If you are not sure if a list item applies to your research, read the appropriate section before selecting a response.

### Materials & experimental systems

| n/a                                 | Involvement in the study                                        |
|-------------------------------------|-----------------------------------------------------------------|
| <input type="checkbox"/>            | <input checked="" type="checkbox"/> Antibodies                  |
| <input type="checkbox"/>            | <input checked="" type="checkbox"/> Eukaryotic cell lines       |
| <input checked="" type="checkbox"/> | <input type="checkbox"/> Palaeontology and archaeology          |
| <input type="checkbox"/>            | <input checked="" type="checkbox"/> Animals and other organisms |
| <input checked="" type="checkbox"/> | <input type="checkbox"/> Clinical data                          |
| <input checked="" type="checkbox"/> | <input type="checkbox"/> Dual use research of concern           |

### Methods

| n/a                                 | Involvement in the study                        |
|-------------------------------------|-------------------------------------------------|
| <input checked="" type="checkbox"/> | <input type="checkbox"/> ChIP-seq               |
| <input checked="" type="checkbox"/> | <input type="checkbox"/> Flow cytometry         |
| <input checked="" type="checkbox"/> | <input type="checkbox"/> MRI-based neuroimaging |

## Antibodies

|                 |                                                                                                                                                                                                                                                                                                                                                                                                                                                                                                                                                                                               |
|-----------------|-----------------------------------------------------------------------------------------------------------------------------------------------------------------------------------------------------------------------------------------------------------------------------------------------------------------------------------------------------------------------------------------------------------------------------------------------------------------------------------------------------------------------------------------------------------------------------------------------|
| Antibodies used | <input type="text" value="Rabbit polyclonal anti-TMEM135 Aviva Systems Biology Cat# ARP49773_P050; RRID:AB_2048451, WB (1:1000); IF (1:100)&lt;br/&gt;Rabbit polyclonal anti-TMEM135 Novus Cat# NBP2-55549; RRID: N/A, WB (1:1000)&lt;br/&gt;Rabbit polyclonal anti-Drp1 Cell Signaling Technology Cat# 8570; RRID:AB_10950498, WB (1:1000); IF (1:50)&lt;br/&gt;Mouse monoclonal anti-COX4 Cell Signaling Technology Cat# 11967; RRID:AB_2797784, WB (1:1000), clone 4D11-B3-E8&lt;br/&gt;Rabbit polyclonal anti-TOM20 Cell Signaling Technology Cat# 42406; RRID:AB_2687663, WB (1:1000)"/> |
|-----------------|-----------------------------------------------------------------------------------------------------------------------------------------------------------------------------------------------------------------------------------------------------------------------------------------------------------------------------------------------------------------------------------------------------------------------------------------------------------------------------------------------------------------------------------------------------------------------------------------------|

Rabbit polyclonal anti-OPA1 Proteintech Cat# 27733-1-AP; RRID:AB\_2810292, WB (1:1000)  
 Rabbit polyclonal anti-Phospho-Drp1 (Ser637) Cell Signaling Technology Cat# 4867; RRID:AB\_10622027, WB (1:1000)  
 Rabbit polyclonal anti-Actin Cell Signaling Technology Cat# 8457; RRID:AB\_10950489, WB (1:1000)  
 Rabbit polyclonal anti-PMP70 Sigma-Aldrich Cat# SAB4200181; RRID:AB\_10639362, WB (1:1000)  
 Rabbit polyclonal anti-AKT Cell Signaling Technology Cat# 9272; RRID:AB\_329827, WB (1:1000)  
 Rabbit polyclonal anti-Phospho-Akt (Ser473) Cell Signaling Technology Cat# 9271; RRID:AB\_329825, WB (1:1000)  
 Rabbit polyclonal anti-Pex16 Proteintech Cat# 14816-1-AP; RRID:AB\_2162250, WB (1:1000)  
 Rabbit polyclonal anti-PMP70-Atto-488 Sigma-Aldrich Cat# P0090; RRID:AB\_1841112, IF (1:100)  
 Rabbit polyclonal anti-Pex19 Proteintech Cat# 14713-1-AP; RRID:AB\_2162265, WB (1:1000)  
 Rabbit polyclonal anti-Pex14 Proteintech Cat# 10594-1-AP; RRID:AB\_2252194, IF (1:50)  
 Rabbit monoclonal anti-PDI Cell Signaling Technology Cat# 3501; RRID:AB\_2156433, WB (1:1000), clone C81H6  
 Rat monoclonal anti-LAMP2 Abcam Cat# ab13524; RRID:AB\_2134736, WB (1:1000), clone GL2A7  
 Rabbit polyclonal anti-Lamin A/C Cell Signaling Technology Cat# 2032; RRID:AB\_2136278, WB (1:1000)  
 Peroxidase IgG Fraction Monoclonal Mouse  
 Anti-Rabbit IgG, light chain specific Jackson Immunoresearch Cat# 211-032-171; RRID:AB\_2339149, WB (1:2000)  
 Peroxidase AffiniPure Goat Anti-Mouse IgG, light  
 chain specific Jackson Immunoresearch Cat# 115-035-174; RRID:AB\_2338512, WB (1:2000)  
 Goat anti-Rabbit IgG (H+L) Cross-Adsorbed Secondary Antibody, Alexa Fluor 594 Thermo Fisher Cat# A-11012; RRID:AB\_141359, IF (1:500)  
 Goat anti-mouse IgG (H+L) Cross-Adsorbed Secondary Antibody, Alexa Fluor 488 Thermo Fisher Cat# A-11001; RRID:AB\_2534069, IF (1:500)

## Validation

TMEM135 (<https://www.avivasysbio.com/tmem135-antibody-n-terminal-region-arp49773-p050.html>)  
 Reactivity: Human, Mouse, Rat, Cow, Dog, Guinea Pig, Horse, Pig, Rabbit  
 Applications: WB, IHC  
 TMEM135 ([https://www.novusbio.com/products/tmem135-antibody\\_nbp1-59377](https://www.novusbio.com/products/tmem135-antibody_nbp1-59377))  
 Reactivity: Human  
 Applications: WB, IHC  
 Drp1 (<https://www.cellsignal.com/products/primary-antibodies/drp1-d6c7-rabbit-mab/8570?requestid=214259>)  
 Reactivity: Human, Mouse, Rat, Monkey  
 Applications: WB, IP, IF  
 COX4 (<https://www.cellsignal.com/products/primary-antibodies/cox-iv-4d11-b3-e8-mouse-mab/11967>)  
 Reactivity: Rat  
 Applications: Human, Mouse, Rat, Monkey  
 Applications: WB, IP, IHC, IF  
 TOM20 (<https://www.cellsignal.com/products/primary-antibodies/tom20-d8t4n-rabbit-mab/42406>)  
 Reactivity: Human, Mouse, Rat, Monkey  
 Applications: WB, IP, IHC, IF  
 OPA1 (<https://www.ptglab.com/products/OPA1-Antibody-27733-1-AP.htm>)  
 Reactivity: Human, Mouse, Rat  
 Applications: WB, IP, IHC  
 Phospho-Drp1 (Ser637) (<https://www.cellsignal.com/products/primary-antibodies/phospho-drp1-ser637-antibody/4867>)  
 Reactivity: Rat  
 Applications: WB, IP  
 Actin (<https://www.cellsignal.com/products/primary-antibodies/b-actin-d6a8-rabbit-mab/8457>)  
 Reactivity: Human, Mouse, Rat, Monkey, D. melanogaster, Zebrafish  
 Applications: WB, IF, FC  
 PMP70 (<https://www.sigmaaldrich.com/US/en/product/sigma/sab4200181>)  
 Reactivity: Human, Mouse, Rat  
 Applications: WB, IF  
 AKT (<https://www.cellsignal.com/products/primary-antibodies/akt-antibody/9272>)  
 Reactivity: Human, Mouse, Rat, Hamster, Monkey, Chicken, D. melanogaster, Bovine, Dog, Pig, Guinea Pig  
 Applications: WB, IP, IF, FC  
 Phospho-Akt (Ser473) (<https://www.cellsignal.com/products/primary-antibodies/phospho-akt-ser473-antibody/9271>)  
 Reactivity: Human, Mouse, Rat, Hamster, Monkey, D. melanogaster, Bovine, Dog  
 Applications: WB, IP, IF, FC  
 Pex16 (<https://www.ptglab.com/products/PEX16-Antibody-14816-1-AP.htm>)  
 Reactivity: Human, Mouse, Rat  
 Applications: WB, IF  
 PMP70-Atto-488 (<https://www.sigmaaldrich.com/US/en/product/sigma/p0090>)  
 Reactivity: Human, Mouse, Rat  
 Applications: IF  
 Pex19 (<https://www.ptglab.com/products/PEX19-Antibody-14713-1-AP.htm>)  
 Reactivity: Human, Mouse  
 Applications: WB, IP, IHC  
 Pex14 (<https://www.ptglab.com/products/PEX14-Antibody-10594-1-AP.htm>)  
 Reactivity: Human, Mouse, Rat  
 Applications: WB, IP, IHC, IF, FC, ELISA  
 PDI (<https://www.cellsignal.com/products/primary-antibodies/pdi-c81h6-rabbit-mab/3501>)  
 Reactivity: Human, Mouse, Rat, Monkey  
 Applications: WB, IHC, IF  
 LAMP2 (<https://www.abcam.com/products/primary-antibodies/lamp2-antibody-gl2a7-ab13524.html>)  
 Reactivity: Human, Mouse, Rabbit  
 Applications: IHC, IF, IP, FC, WB  
 Lamin A/C (<https://www.cellsignal.com/products/primary-antibodies/lamin-a-c-antibody/2032>)

Reactivity: Human, Mouse, Rat  
 Applications: IHC, WB  
 Rabbit IgG, light chain specific Jackson ImmunoResearch (<https://www.jacksonimmuno.com/catalog/products/211-032-171>)  
 Mouse IgG, light chain specific Jackson ImmunoResearch (<https://www.jacksonimmuno.com/catalog/products/115-035-174>)  
 Goat anti-Rabbit IgG (H+L) Cross-Adsorbed Secondary Antibody, Alexa Fluor 594 (<https://www.thermofisher.com/antibody/product/Goat-anti-Rabbit-IgG-H-L-Cross-Adsorbed-Secondary-Antibody-Polyclonal/A-11012>)  
 Goat anti-mouse IgG (H+L) Cross-Adsorbed Secondary Antibody, Alexa Fluor 488 (<https://www.thermofisher.com/antibody/product/Goat-anti-Mouse-IgG-H-L-Cross-Adsorbed-Secondary-Antibody-Polyclonal/A-11001>)

## Eukaryotic cell lines

Policy information about [cell lines and Sex and Gender in Research](#)

|                                                                   |                                                                                                                                                                                                                      |
|-------------------------------------------------------------------|----------------------------------------------------------------------------------------------------------------------------------------------------------------------------------------------------------------------|
| Cell line source(s)                                               | Immortalized mouse brown preadipocytes were isolated in the Lodhi lab and have been previously described. Immortalized human brown preadipocytes were generated in the Tseng lab and have been previously described. |
| Authentication                                                    | We did not make efforts to authenticate cell lines.                                                                                                                                                                  |
| Mycoplasma contamination                                          | All cell lines were tested negative for mycoplasma.                                                                                                                                                                  |
| Commonly misidentified lines (See <a href="#">ICLAC</a> register) | No commonly misidentified cell were studied.                                                                                                                                                                         |

## Animals and other research organisms

Policy information about [studies involving animals](#); [ARRIVE guidelines](#) recommended for reporting animal research, and [Sex and Gender in Research](#)

|                         |                                                                                                                                                                                                                                                                                                                                                                                  |
|-------------------------|----------------------------------------------------------------------------------------------------------------------------------------------------------------------------------------------------------------------------------------------------------------------------------------------------------------------------------------------------------------------------------|
| Laboratory animals      | Pex16-AKO, TMEM135-AKO, Adiponectin-Cre, TMEM135TG and Pex16-AKO-TMEM135TG mice were used in experiments starting at 8 to 10 weeks of age. These mice were generated on the C57BL/6J genetic background. Mice were maintained under constant temperature (22-24°C), circulating air and humidity (45-65%) with 12h:12h light/dark cycle. Mice had free access to food and water. |
| Wild animals            | No wild animals were used in this study.                                                                                                                                                                                                                                                                                                                                         |
| Reporting on sex        | Both male and female animals were studied for metabolic phenotyping studies, as indicated in figure legends.                                                                                                                                                                                                                                                                     |
| Field-collected samples | No field collected samples were used in the study.                                                                                                                                                                                                                                                                                                                               |
| Ethics oversight        | All animal protocols were approved by the Washington University Institutional Animal Care and Use Committee.                                                                                                                                                                                                                                                                     |

Note that full information on the approval of the study protocol must also be provided in the manuscript.
